# Supplementary material for: A Cu(I) coordination polymer employing a nonsteroidal aromatase inhibitor letrozole as a building block†
Source: Royal Society of Chemistry journal article supplement (doi:10.1039/b104880p), 2001-01-01
Supplement: b104880p.doc [file b104880p.doc]

#

A three-dimensional microporous perspective view of **1** with highlighted tetrahedral Cu.
